# Supplementary material for: Does environmental regulation affect global value chain position in service sectors? Evidence from 41 major economies
Source: Frontiers journal article supplement (doi:10.3389/fenvs.2022.1051015), 2022-10-20
Supplement: Data_Sheet_1.docx [file Data_Sheet_1.docx]

**Appendix**

**Table A1 Descriptive statistics of EPI index**

| Variable | N | Mean | SD | Min | Max |
| --- | --- | --- | --- | --- | --- |
| All sample countries | 205 | 61.99 | 9.877 | 31.23 | 87.67 |
| High-income countries | 165 | 65.23 | 7.330 | 47.60 | 87.67 |
| Middle-income countries | 40 | 48.64 | 7.546 | 31.23 | 64.01 |

**Table A2 Description of service sectors in WIOD**

| Code | Name |
| --- | --- |
| 24 | Production and supply of electricity, gas, steam and air conditioning |
| 25 | Water collection, treatment and supply |
| 26 | Sewage treatment; Waste collection, treatment and disposal activities; Material recycling; Rehabilitation activities and other waste management services |
| 27 | Construction |
| 28 | Wholesale, retail trade and maintenance of automobiles and motorcycles |
| 29 | Wholesale trade, excluding automobiles and motorcycles |
| 30 | Retail trade, excluding automobiles and motorcycles |
| 31 | Land transportation and pipeline transportation |
| 32 | Water transport |
| 33 | Air transport |
| 34 | Warehousing and support activities for transportation |
| 35 | Postal and express |
| 36 | Accommodation and catering |
| 37 | Publishing |
| 38 | Film, video and television production, recording and music production |
| 39 | Telecommunication |
| 40 | Computer programming, consulting and related activities; Information service activities |
| 41 | Financial services activities, excluding insurance and pension funds |
| 42 | Insurance, reinsurance and pension funds, excluding compulsory social security |
| 43 | Ancillary activities of financial services and insurance services |
| 44 | Real estate |
| 45 | Legal and accounting activities; Headquarters activities; Management consulting activities |
| 46 | Construction engineering activities; Technical test and analysis activities |
| 47 | Scientific research and development activities |
| 48 | Advertising and market research activities |
| 49 | Other professional technical services |
| 50 | Administrative and support services activities |
| 51 | Public administration and national defense; Compulsory social security |
| 52 | Education |
| 53 | Human health and social work activities |
| 54 | Other service activities |
| 55 | Activities of the family as an employer; Undifferentiated production of goods and services for household use |

**Table A3 Result of GVC position index in service sectors**

| Country | 2006 | 2008 | 2010 | 2012 | 2014 |
| --- | --- | --- | --- | --- | --- |
| Australia | 0.40 | 0.42 | 0.45 | 0.45 | 0.45 |
| Austria | 0.33 | 0.34 | 0.34 | 0.33 | 0.33 |
| Belgium | 0.31 | 0.29 | 0.26 | 0.24 | 0.24 |
| Bulgaria | 0.25 | 0.26 | 0.32 | 0.28 | 0.27 |
| Brazil | 0.45 | 0.47 | 0.48 | 0.48 | 0.47 |
| Canada | 0.27 | 0.31 | 0.32 | 0.30 | 0.29 |
| Switzerland | 0.34 | 0.34 | 0.34 | 0.32 | 0.32 |
| China | 0.35 | 0.35 | 0.38 | 0.39 | 0.40 |
| Cyprus | 0.23 | 0.26 | 0.30 | 0.30 | 0.28 |
| Czech Republic | 0.32 | 0.34 | 0.32 | 0.29 | 0.29 |
| Germany | 0.36 | 0.35 | 0.35 | 0.35 | 0.35 |
| Denmark | 0.03 | 0.02 | 0.05 | 0.01 | 0.05 |
| Spain | 0.36 | 0.36 | 0.35 | 0.35 | 0.33 |
| Estonia | 0.25 | 0.27 | 0.29 | 0.28 | 0.27 |
| Finland | 0.33 | 0.32 | 0.32 | 0.32 | 0.31 |
| France | 0.35 | 0.35 | 0.35 | 0.34 | 0.34 |
| United Kingdom | 0.40 | 0.40 | 0.37 | 0.36 | 0.38 |
| Greece | 0.28 | 0.27 | 0.30 | 0.29 | 0.29 |
| Croatia | 0.30 | 0.32 | 0.34 | 0.34 | 0.33 |
| Hungary | 0.24 | 0.24 | 0.25 | 0.26 | 0.25 |
| India | 0.32 | 0.36 | 0.38 | 0.32 | 0.33 |
| Ireland | 0.12 | 0.09 | 0.07 | 0.04 | 0.01 |
| Italy | 0.39 | 0.40 | 0.37 | 0.37 | 0.36 |
| Japan | 0.33 | 0.34 | 0.36 | 0.38 | 0.33 |
| South Korea | 0.33 | 0.29 | 0.29 | 0.26 | 0.33 |
| Lithuania | 0.32 | 0.36 | 0.40 | 0.36 | 0.35 |
| Luxembourg | -0.16 | -0.15 | -0.14 | -0.17 | -0.20 |
| Latvia | 0.29 | 0.33 | 0.31 | 0.28 | 0.30 |
| Mexico | 0.33 | 0.34 | 0.33 | 0.32 | 0.30 |
| Malta | -0.17 | -0.26 | -0.30 | -0.29 | -0.27 |
| Netherlands | 0.36 | 0.36 | 0.29 | 0.29 | 0.33 |
| Norway | 0.28 | 0.30 | 0.29 | 0.28 | 0.32 |
| Poland | 0.34 | 0.35 | 0.33 | 0.33 | 0.32 |
| Portugal | 0.38 | 0.38 | 0.37 | 0.38 | 0.37 |
| Romania | 0.33 | 0.37 | 0.30 | 0.30 | 0.31 |
| Russia | 0.57 | 0.58 | 0.58 | 0.59 | 0.58 |
| Slovakia | 0.29 | 0.29 | 0.31 | 0.33 | 0.33 |
| Slovenia | 0.29 | 0.30 | 0.29 | 0.29 | 0.29 |
| Sweden | 0.32 | 0.32 | 0.34 | 0.32 | 0.32 |
| Turkey | 0.35 | 0.37 | 0.39 | 0.39 | 0.38 |
| United States | 0.41 | 0.42 | 0.43 | 0.42 | 0.43 |
